# Supplementary material for: Potent and Specific Antibacterial Activity against Escherichia coli O157:H7 and Methicillin Resistant Staphylococcus aureus (MRSA) of G17 and G19 Peptides Encapsulated into Poly-Lactic-Co-Glycolic Acid (PLGA) Nanoparticles
Source: PubMed Central journal article supplement (PMC7400247; doi:10.3390/antibiotics9070384), 2020-07-07
Supplement: antibiotics-09-00384-s001.pdf [file antibiotics-09-00384-s001.pdf]

## SUPPLEMENTARY MATERIALS

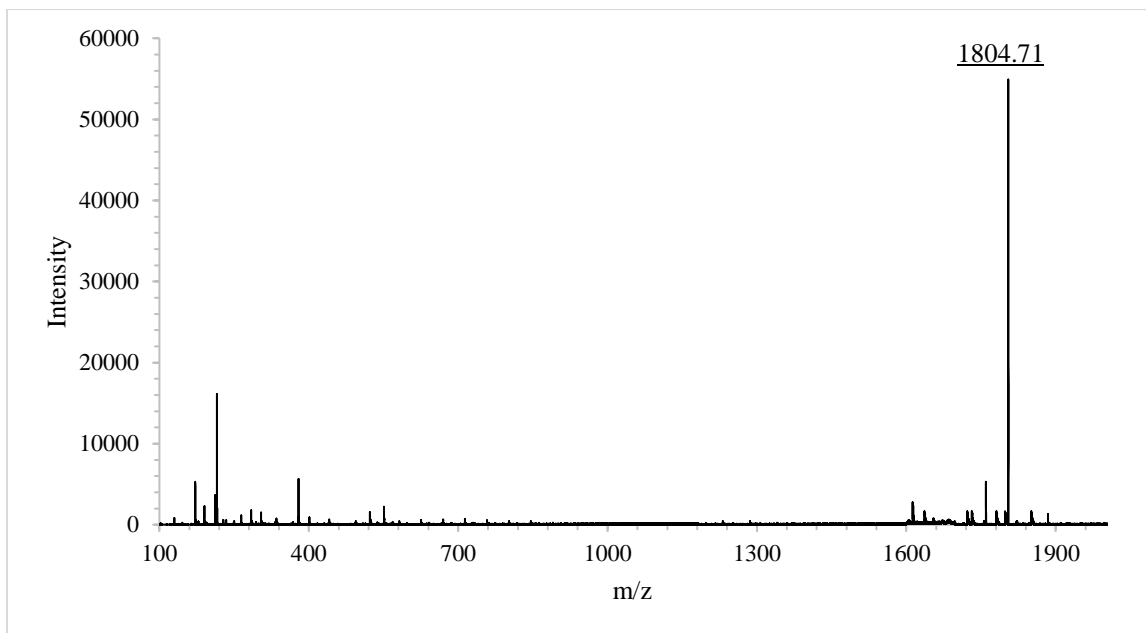

(A)

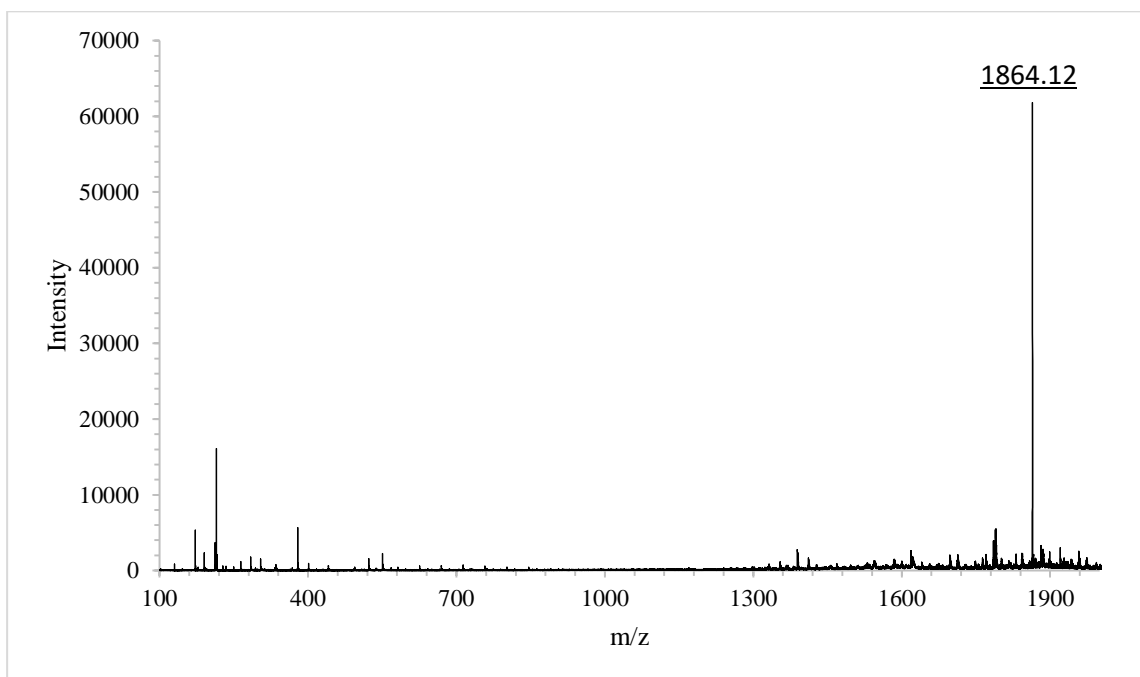

(B)

**Figure S1.** MALDI-ToF mass spectra of G17 (A) and G19 (B), the samples were prepared using a matrix of  $\alpha$ -cyano-4-hydroxycinnamic acid (CHCA), the peptide was deposited on the target by the double layer method, that is, a saturated matrix base, followed by the sample and finally a second matrix layer

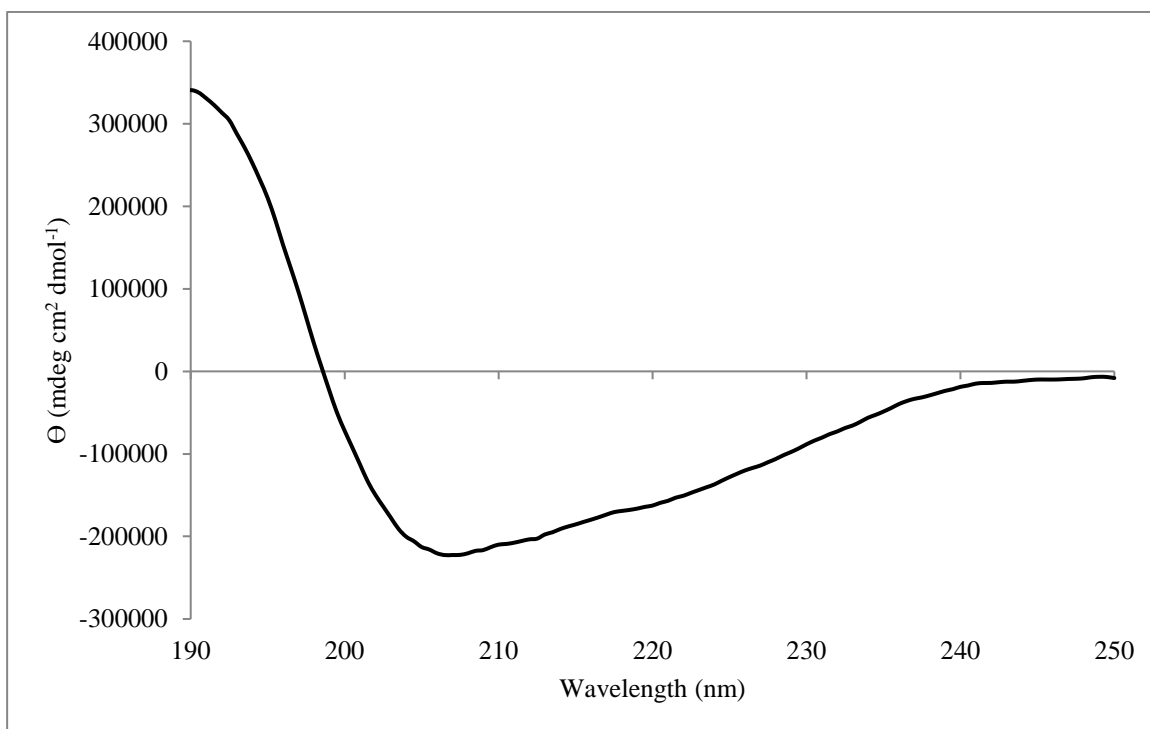

(A)

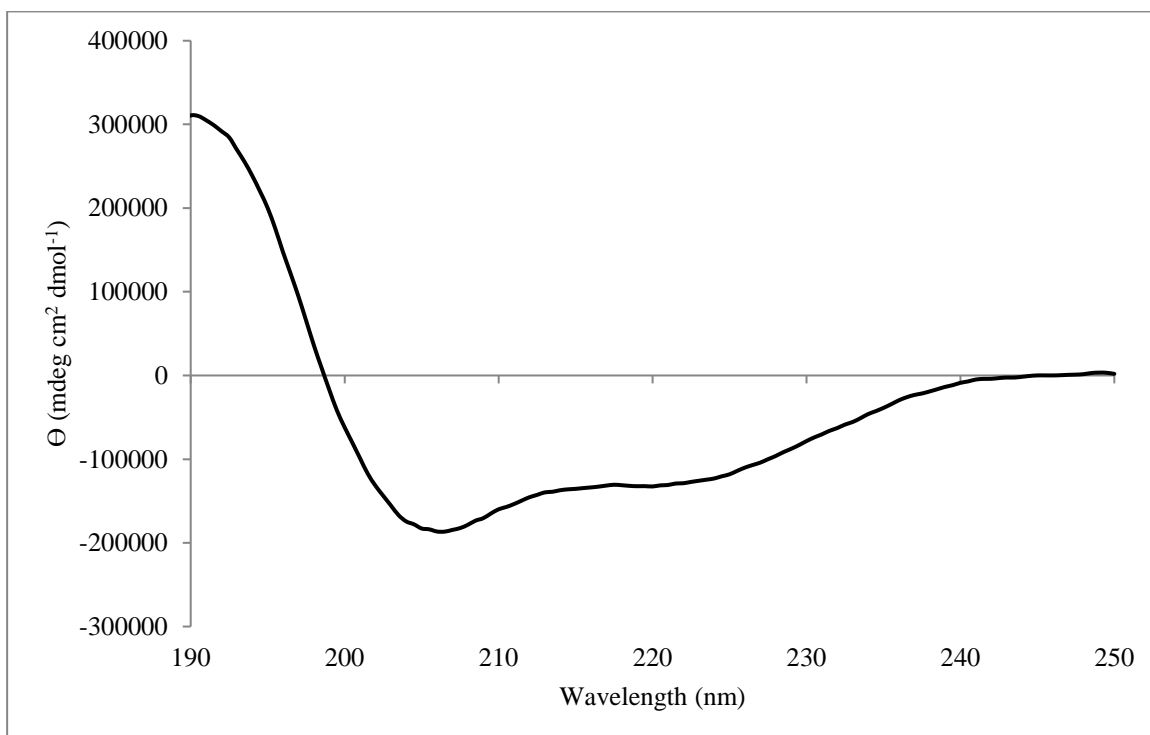

(B)

**Figure S2.** Circular dichroism spectra of G17 (A) and G19 (B) under simulated membrane conditions in 30% (v/v) trifluoroethyl alcohol (TFE) solution.
